# Supplementary material for: Associations between Maternal Dietary Patterns and Infant Birth Weight in the NISAMI Cohort: A Structural Equation Modeling Analysis
Source: MDPI journal article supplement (doi:10.3390/nu13114054), 2021-11-12
Supplement: s1 [file s1]

**Frame S1.** Factors used in the estimation of daily consumption of foods included in the FFQ.

| Reported Frequency  | Daily Frequency      |
|---------------------|----------------------|
| 3 or more times/day | $3 \times 1 = 3$     |
| 2 to 3 times/day    | $2.5 \times 1 = 2.5$ |
| 1 time/day          | $1 \times 1 = 1$     |
| 5 to 6 times/week   | $5.5/7 = 0.79$       |
| 2 to 4 times/week   | $3/7 = 0.43$         |
| 1 time/week         | $1/7 = 0.14$         |
| 1 to 3 times/month  | $2/30 = 0.07$        |
| 1 time/month        | $1/30 = 0.03$        |
| Never/Almost never  | 0                    |

**Table S1:** Food groups taken from the the FFQ and their respective foods. Santo Antônio de Jesus, Bahia, Brazil, 2012 a 2013.

| Group                                     | Pregnancy trimesters | Foods                                                                                                                                                              |
|-------------------------------------------|----------------------|--------------------------------------------------------------------------------------------------------------------------------------------------------------------|
| <b>Cereals, roots and tubers</b>          | First trimester      | Rice; Pasta; Manioc Flour; Sweet Biscuits; Cakes; Savoury Biscuits; Corn/Maize; Oats;                                                                              |
|                                           | Third trimester      | Couscous; Tapioca; Bread; Potato and Cassava.                                                                                                                      |
| <b>Legumes</b>                            | First trimester      | Beans and Pidgeon Pea                                                                                                                                              |
|                                           | Third trimester      |                                                                                                                                                                    |
| <b>Vegetables</b>                         | First trimester      | Lettuce; Chayote; Carrot; Collard Greens;                                                                                                                          |
|                                           | Third trimester      | Cabbage; Tomato; Pumpkin; Cucumber; Scarlet Eggplant; Onion; Garlic and Peppers                                                                                    |
| <b>Fruit</b>                              | First trimester      | Banana; Papaya; Orange; Apple;                                                                                                                                     |
|                                           | Third trimester      | Watermelon; Pineapple; Tangerine; Breadfruit; Avocado; Mango; Lime; Passion fruit; Guava; Natural Juice and Plantains.                                             |
| <b>Sugars and sweets</b>                  | First trimester      | Sugar; Caramels and sweets; Powdered                                                                                                                               |
|                                           | Third trimester      | chocolate and Guava paste                                                                                                                                          |
| <b>Processed and industrialized foods</b> | First trimester      | Ready-made products (Soft drinks; Artificial Juice; Stock; Ready-made Soup and Sauces). Cured meat products (Linguiça; Mortadella; Carne-do-sol; Jerky and Bacon). |
|                                           | Third trimester      |                                                                                                                                                                    |
| <b>Milk and dairy products</b>            | First trimester      | Whole milk; Cheese; Full-fat Yoghurt and Requeijão.                                                                                                                |
|                                           | Third trimester      |                                                                                                                                                                    |
| <b>Meat and eggs</b>                      | First trimester      | Eggs; Offal; Beef with bones; Boneless Beef;                                                                                                                       |
|                                           | Third trimester      | Chicken; Fish and Pork.                                                                                                                                            |
| <b>Fats</b>                               | First trimester      | Margerine and Butter                                                                                                                                               |
|                                           | Third trimester      |                                                                                                                                                                    |
| <b>Fried Snacks</b>                       | First trimester      | Fried Snacks                                                                                                                                                       |
|                                           | Third trimester      |                                                                                                                                                                    |
| <b>Coffee</b>                             | First trimester      | Coffee.                                                                                                                                                            |
|                                           | Third trimester      |                                                                                                                                                                    |
